# Supplementary material for: Dimacrolide Sesquiterpene Pyridine Alkaloids from the Stems of <em>Tripterygium regelii</em>
Source: Preprints.org preprint supplement (doi:10.20944/preprints201608.0221.v1), 2016-08-29
Supplement: Supplementary file 1 [file supplementary]

# Supplementary Materials: Dimacrolide Sesquiterpene Pyridine Alkaloids from the Stems of *Tripterygium regelii*

Dongsheng Fan, Guo-Yuan Zhu, Ting Li, Zhi-Hong Jiang and Li-Ping Bai

## Table of contents

**Figure S1.** HRESIMS spectrum of compound **1**.

**Figure S2.** UV spectrum of compound **1** in MeOH.

**Figure S3.**  $^1\text{H}$ -NMR spectrum of compound **1** in  $\text{CD}_3\text{OD}$ .

**Figure S4.**  $^{13}\text{C}$  and DEPT NMR spectra of compound **1** in  $\text{CD}_3\text{OD}$ .

**Figure S5.**  $^1\text{H}$ - $^1\text{H}$  COSY spectrum of compound **1** in  $\text{CD}_3\text{OD}$ .

**Figure S6.** HSQC spectrum of compound **1** in  $\text{CD}_3\text{OD}$ .

**Figure S7.** HMBC spectrum of compound **1** in  $\text{CD}_3\text{OD}$ .

**Figure S8.** NOESY spectrum of compound **1** in  $\text{CD}_3\text{OD}$ .

**Figure S9.** CD spectrum of compound **1** in MeOH.

**Figure S10.** HRESIMS spectrum of compound **2**.

**Figure S11.** UV spectrum of compound **2** in MeOH.

**Figure S12.**  $^1\text{H}$  NMR spectrum of compound **2** in  $\text{CD}_3\text{OD}$ .

**Figure S13.**  $^{13}\text{C}$  and DEPT NMR spectra of compound **2** in  $\text{CD}_3\text{OD}$ .

**Figure S14.**  $^1\text{H}$ - $^1\text{H}$  COSY spectrum of compound **2** in  $\text{CD}_3\text{OD}$ .

**Figure S15.** HSQC spectrum of compound **2** in  $\text{CD}_3\text{OD}$ .

**Figure S16.** HMBC spectrum of compound **2** in  $\text{CD}_3\text{OD}$ .

**Figure S17.** NOESY spectrum of compound **2** in  $\text{CD}_3\text{OD}$ .

**Figure S18.** CD spectrum of compound **2** in MeOH.

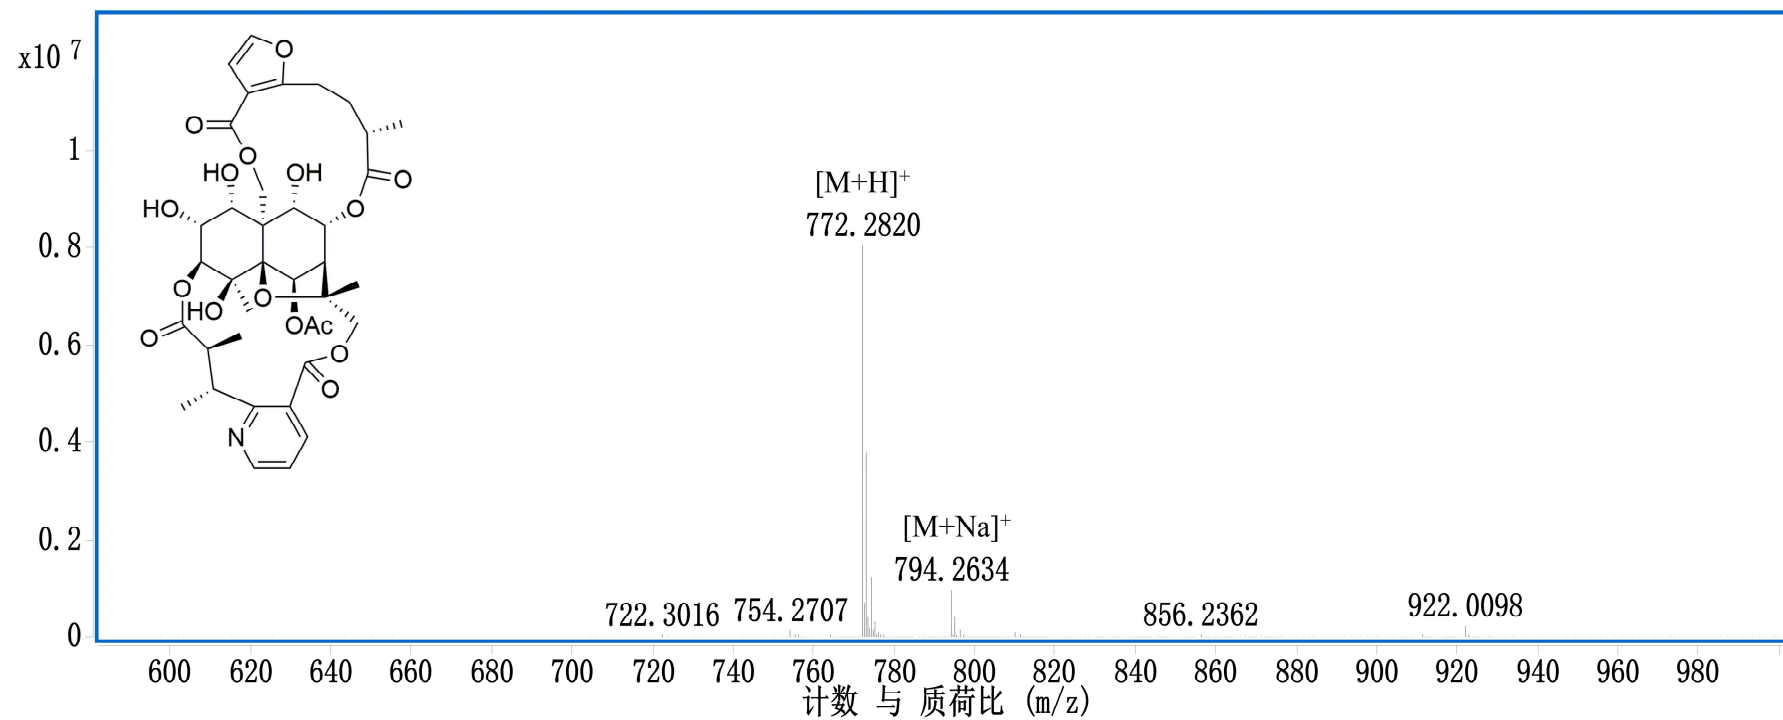

Figure S1. HRESIMS spectrum of compound 1.

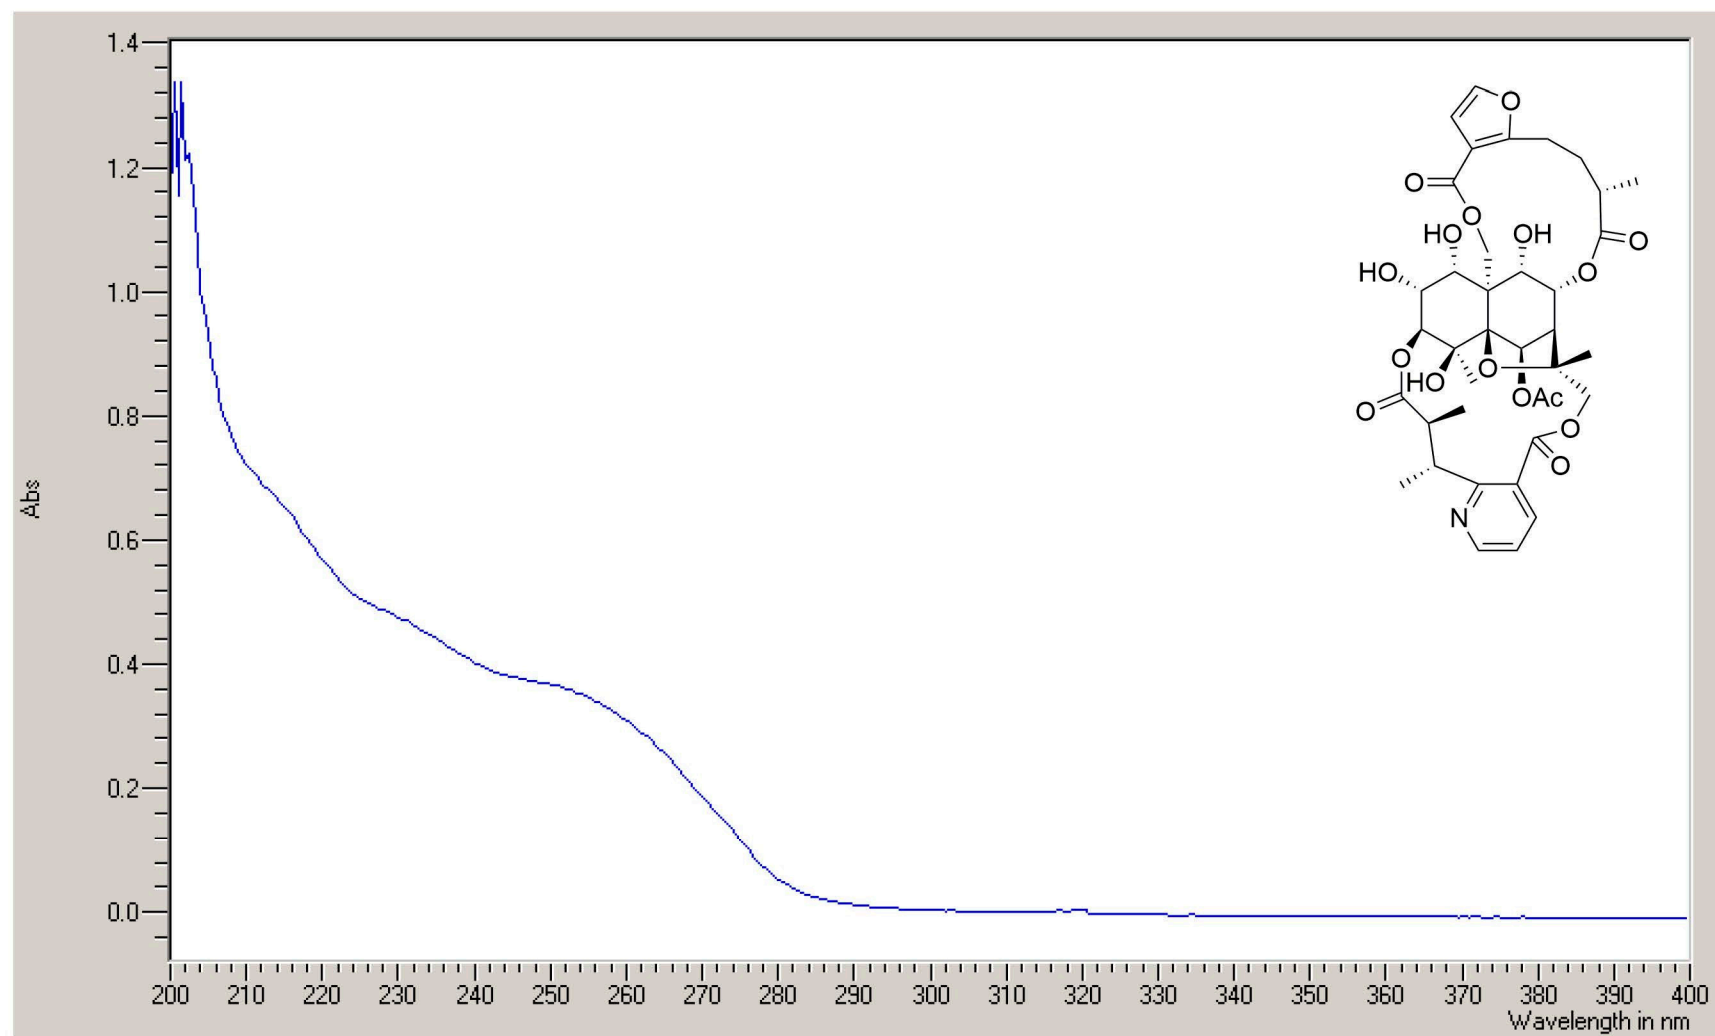

**Figure S2.** UV spectrum of compound **1** in CH<sub>3</sub>OH.

**Figure S3.**  $^1\text{H}$ -NMR spectrum of compound **1** in  $\text{CD}_3\text{OD}$ .

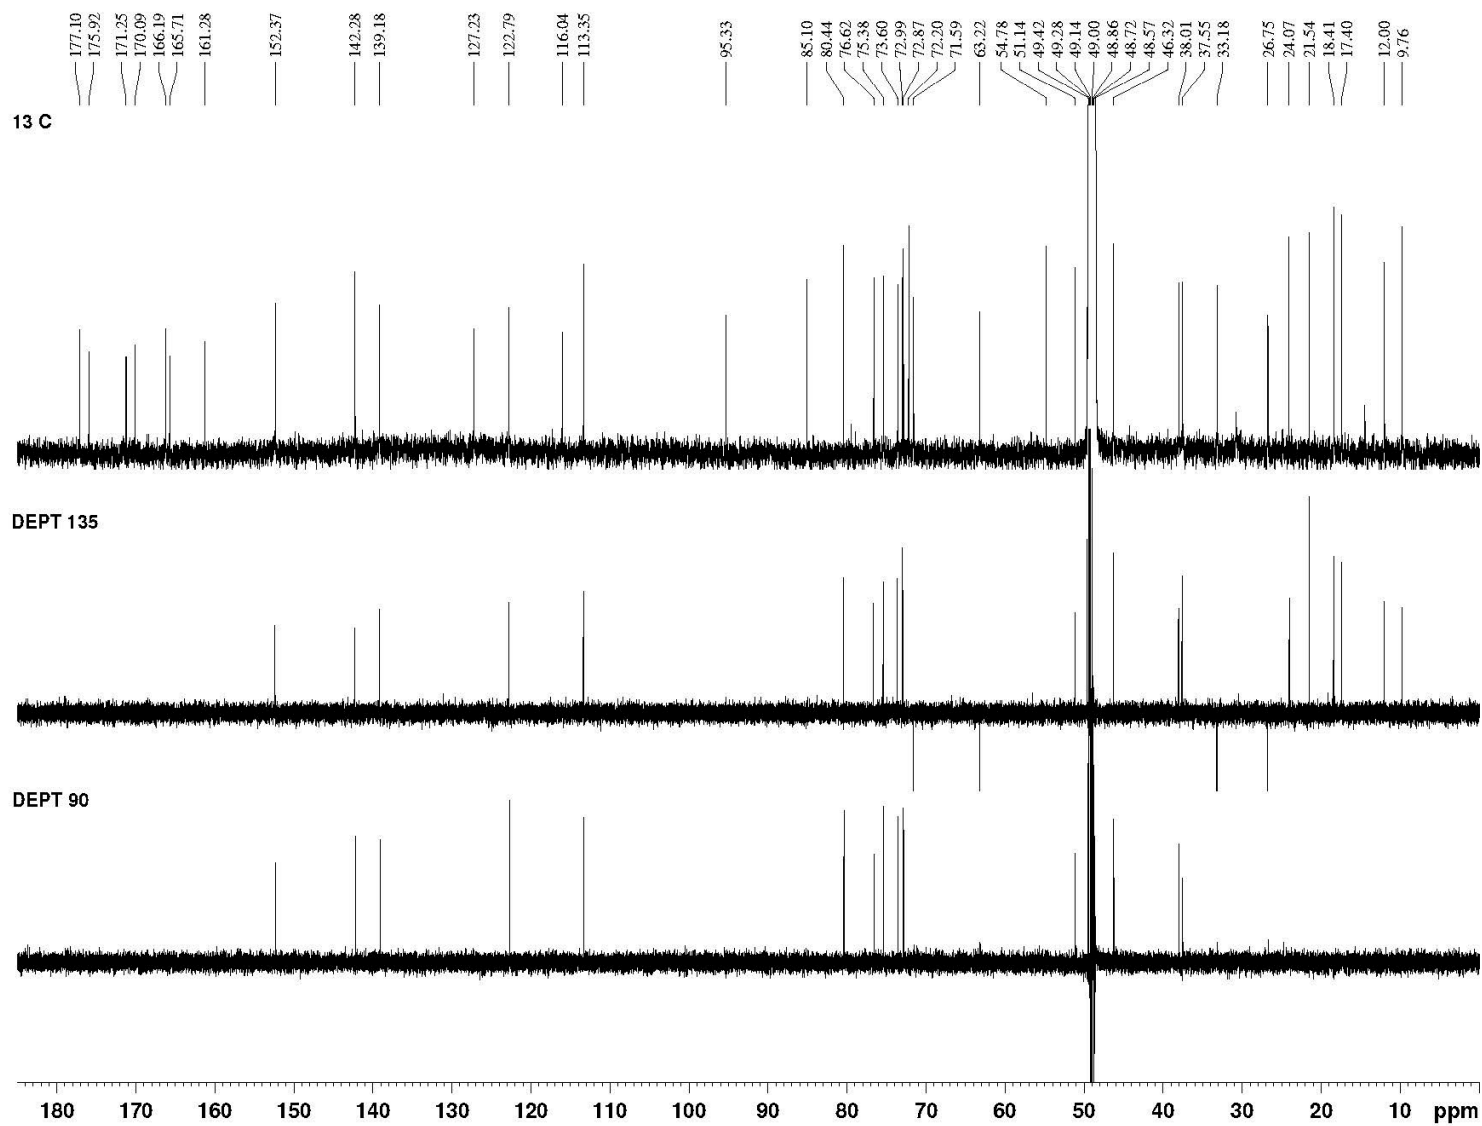

Figure S4. <sup>13</sup>C and DEPT NMR spectra of compound 1 in CD<sub>3</sub>OD.

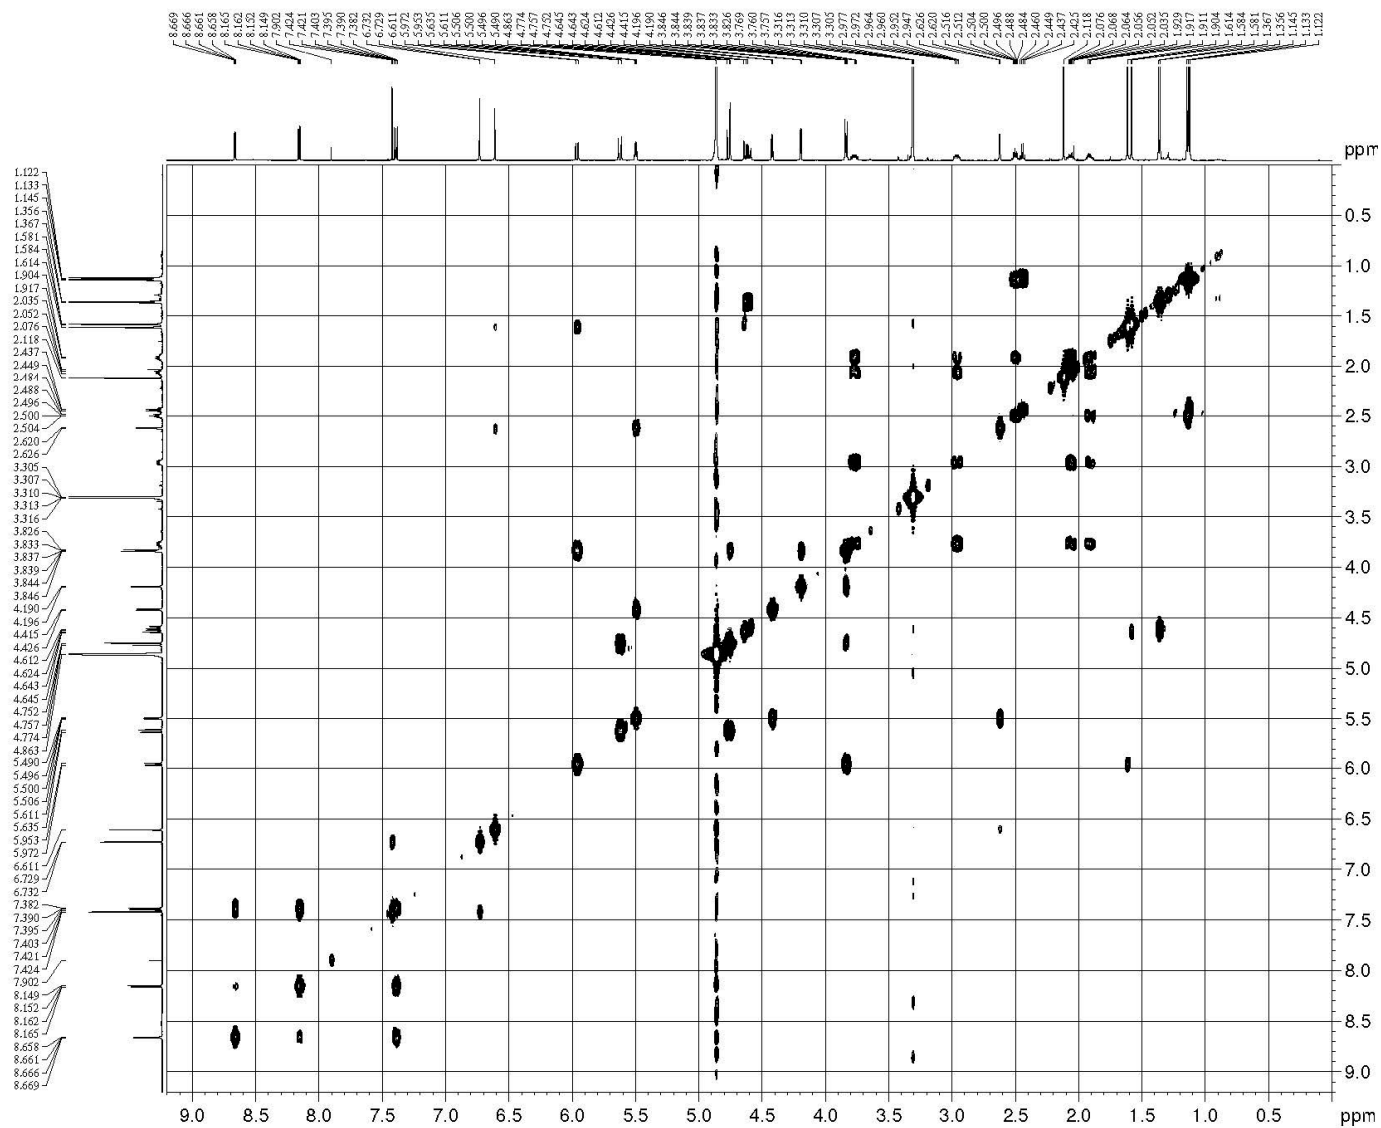

Figure S5.  $^1\text{H}$ - $^1\text{H}$  COSY spectrum of compound 1 in  $\text{CD}_3\text{OD}$ .

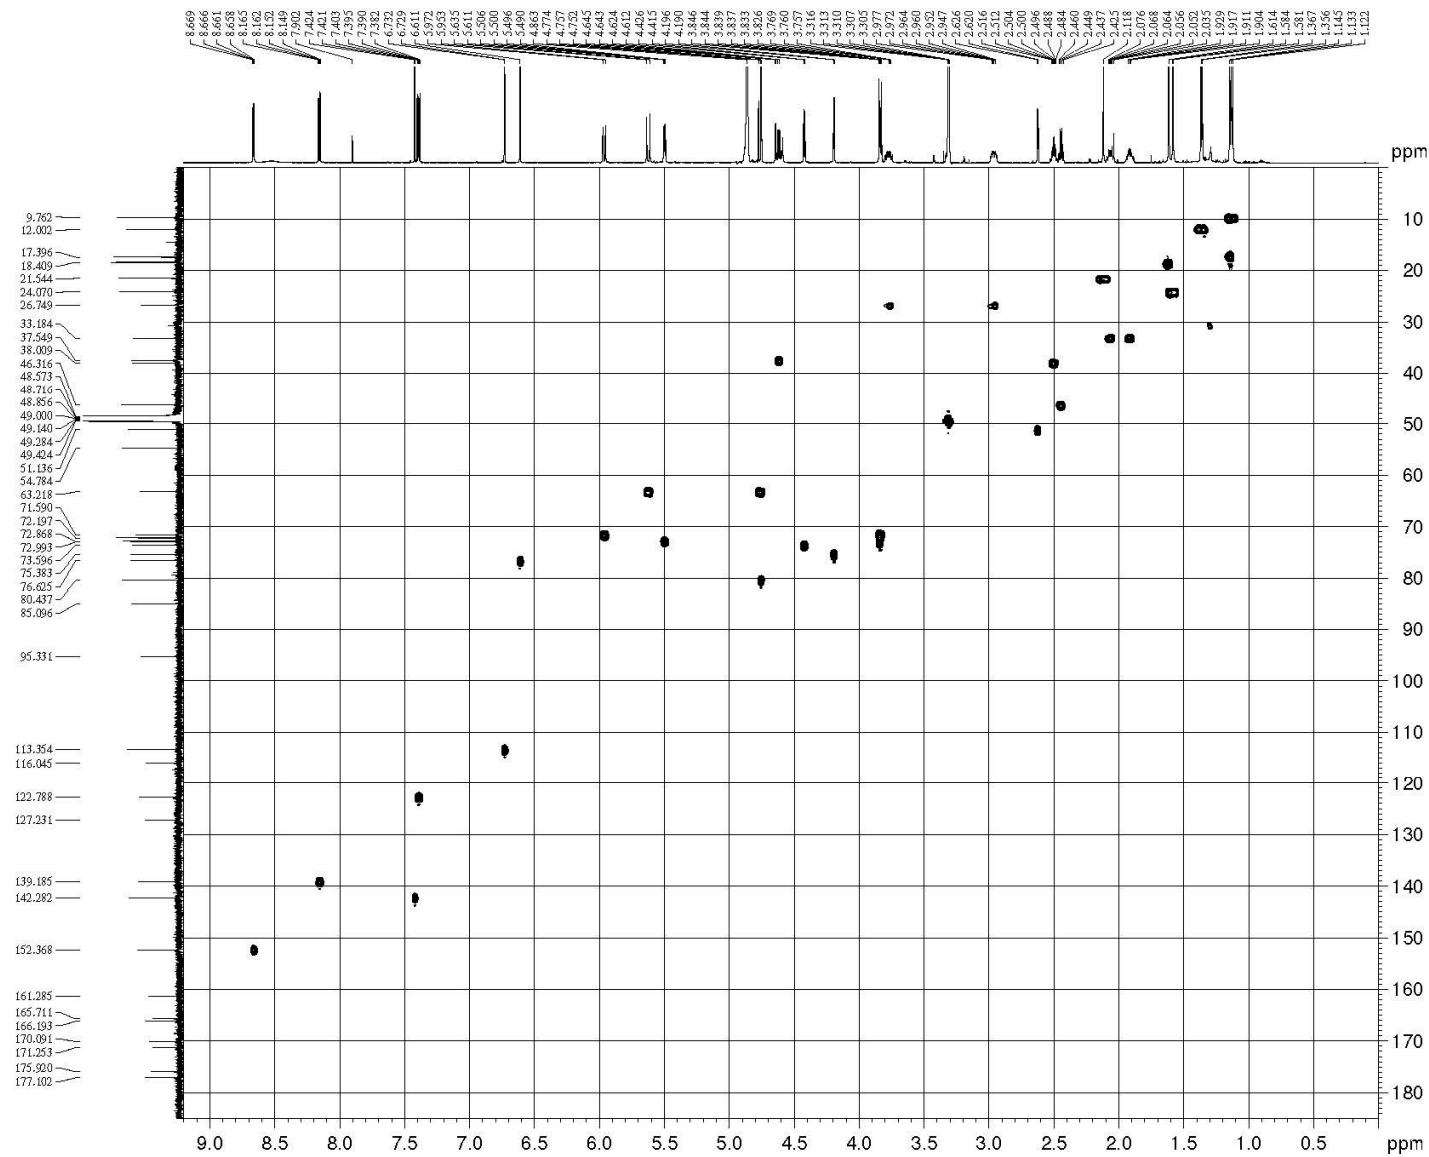Figure S6. HSQC spectrum of compound 1 in CD<sub>3</sub>OD.

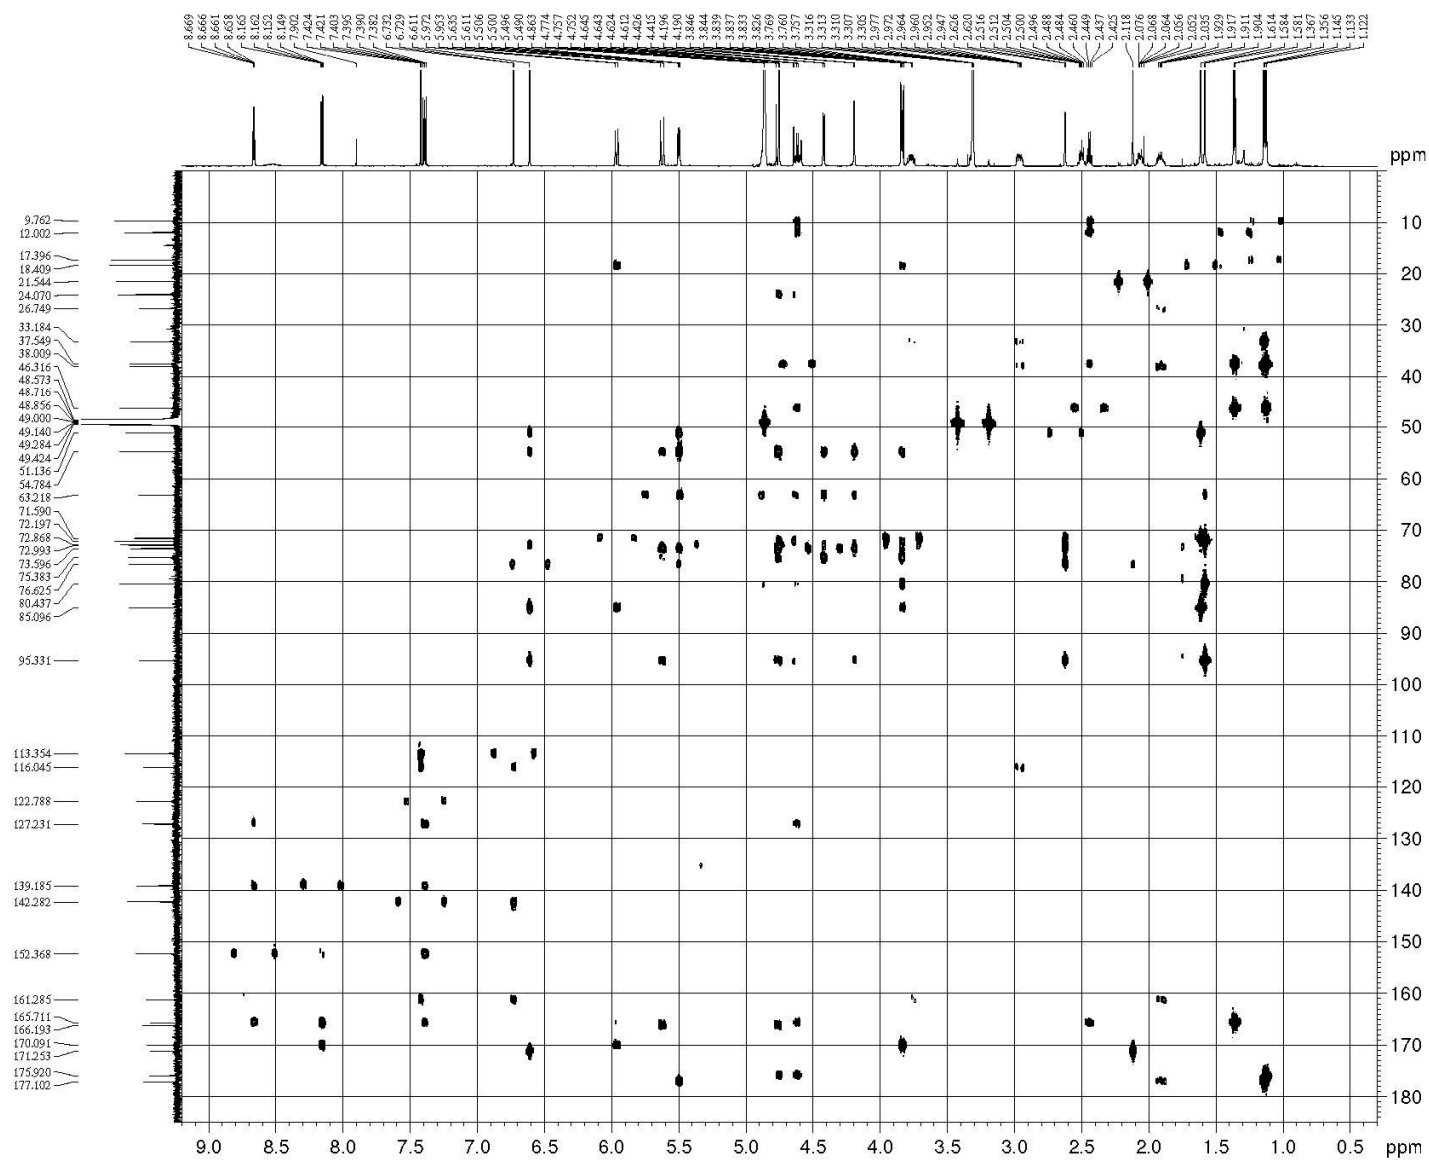Figure S7. HMBC spectrum of compound 1 in CD<sub>3</sub>OD.



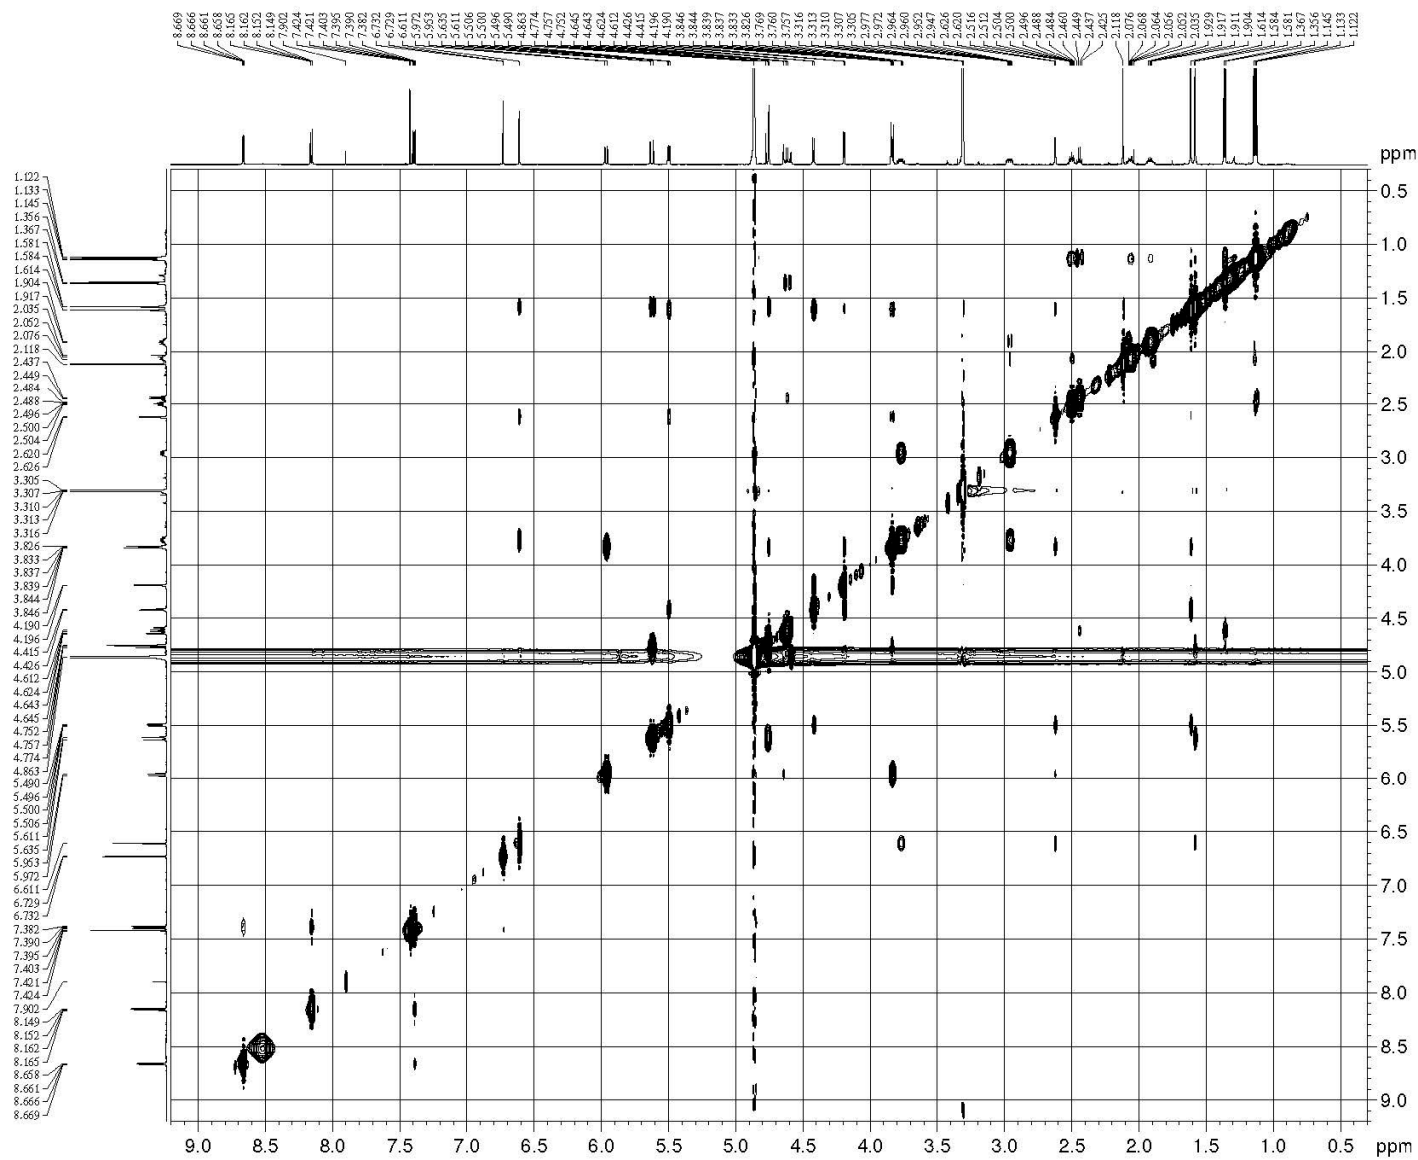

**Figure S8.** NOESY spectrum of compound **1** in CD<sub>3</sub>OD.

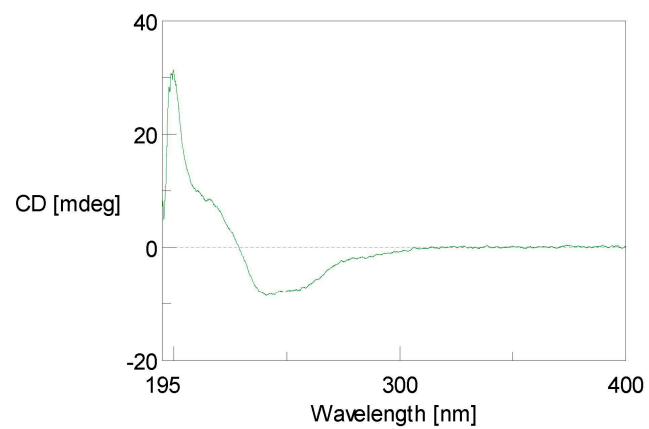

Figure S9. CD spectrum of compound **1** in MeOH.

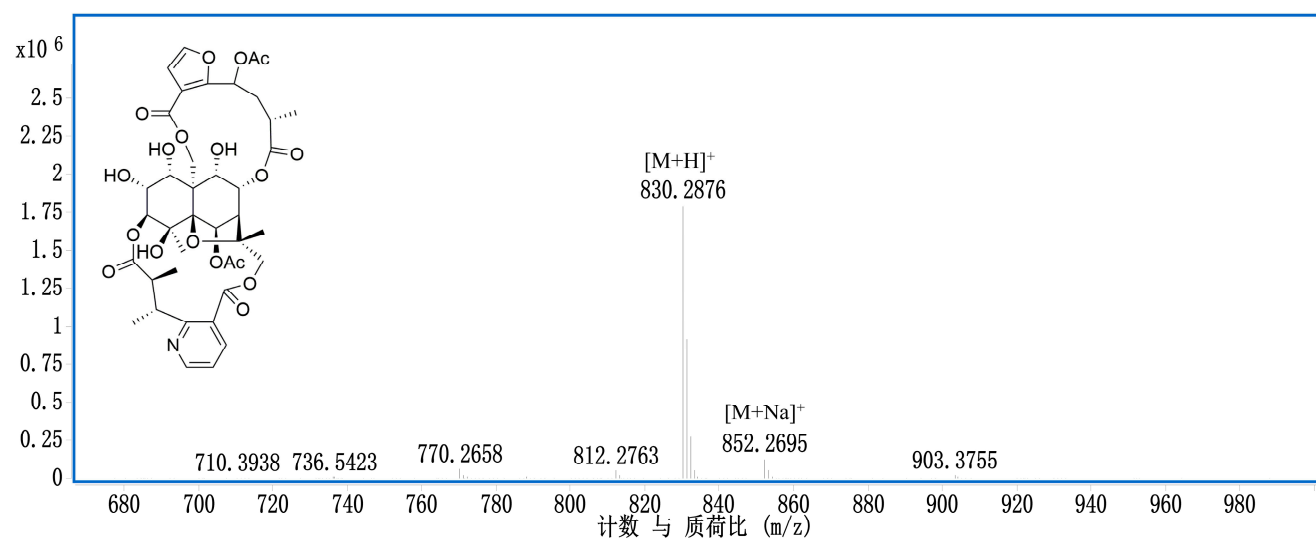

Figure S10. HRESIMS spectrum of compound **2**.

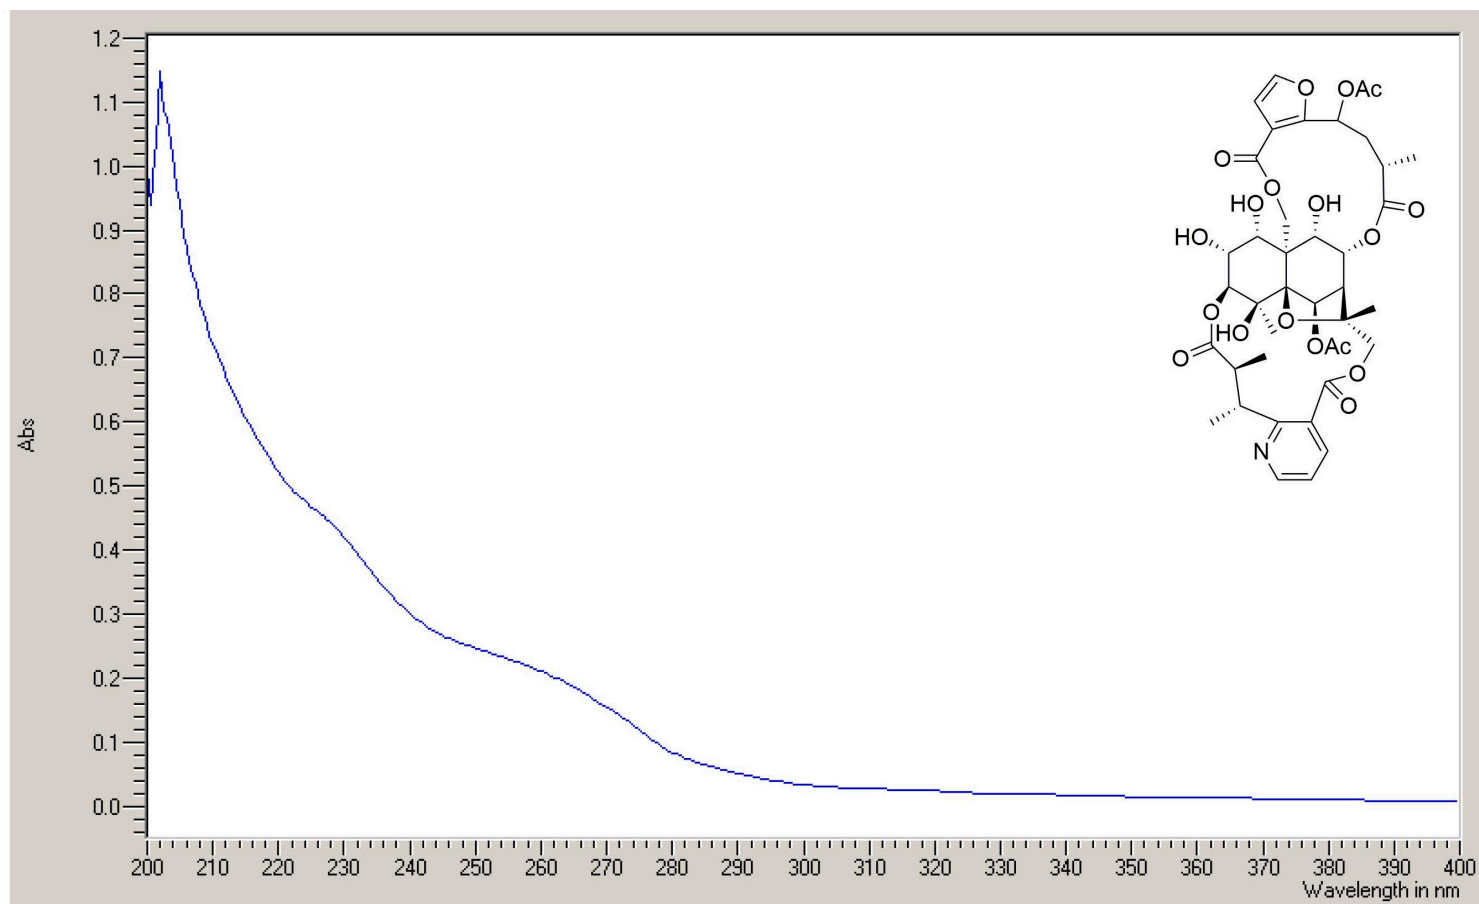

**Figure S11.** UV spectrum of compound 2 in CH<sub>3</sub>OH.

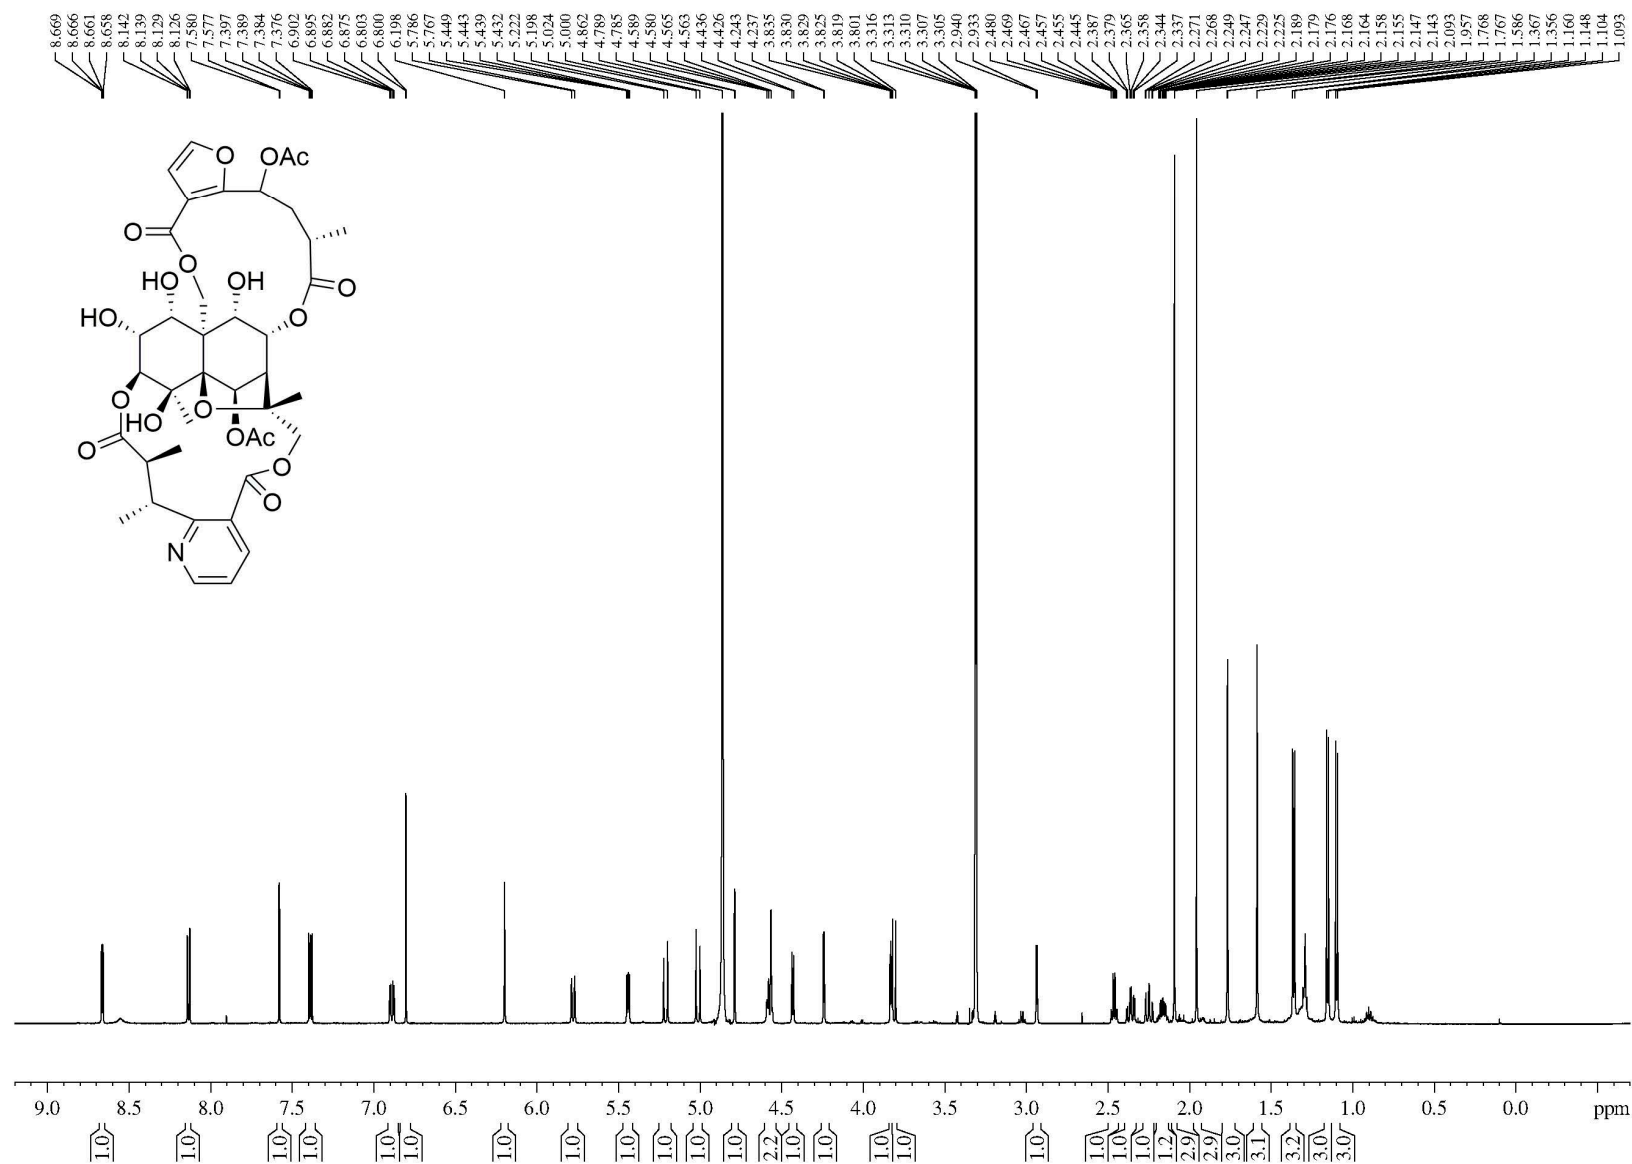

Figure S12.  $^1\text{H}$ -NMR spectrum of compound **2** in  $\text{CD}_3\text{OD}$ .

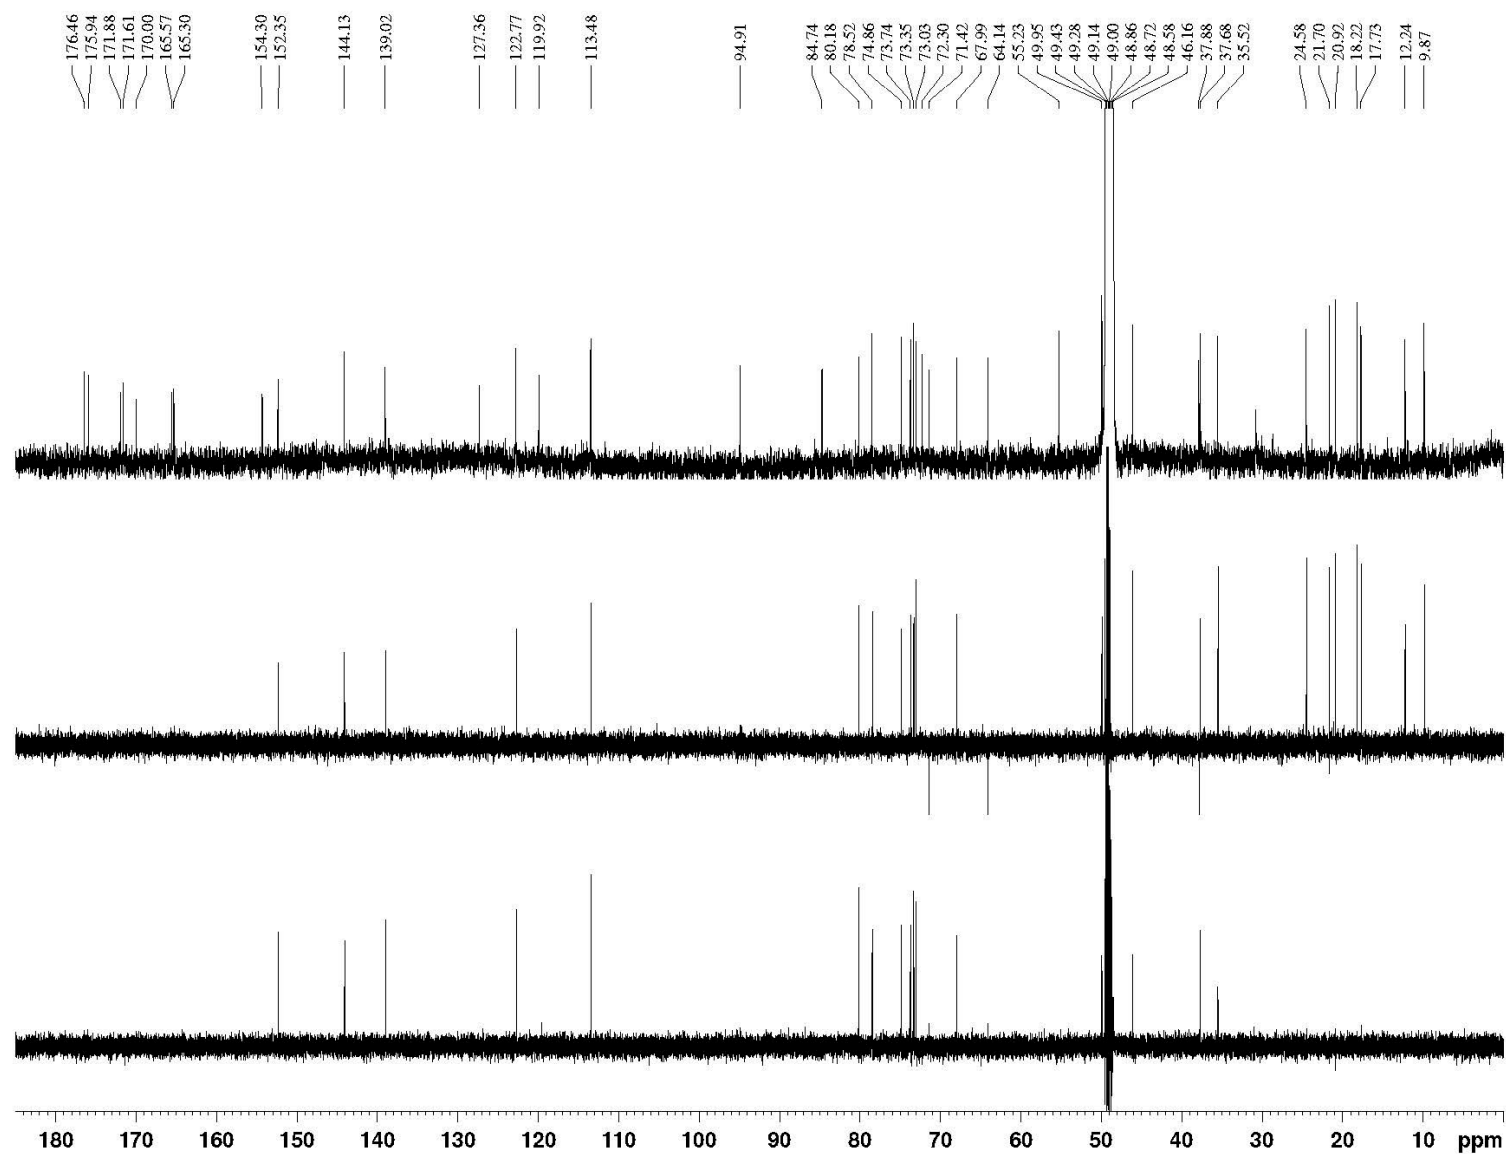

Figure S13. <sup>13</sup>C and DEPT NMR spectra of compound 2 in CD<sub>3</sub>OD.

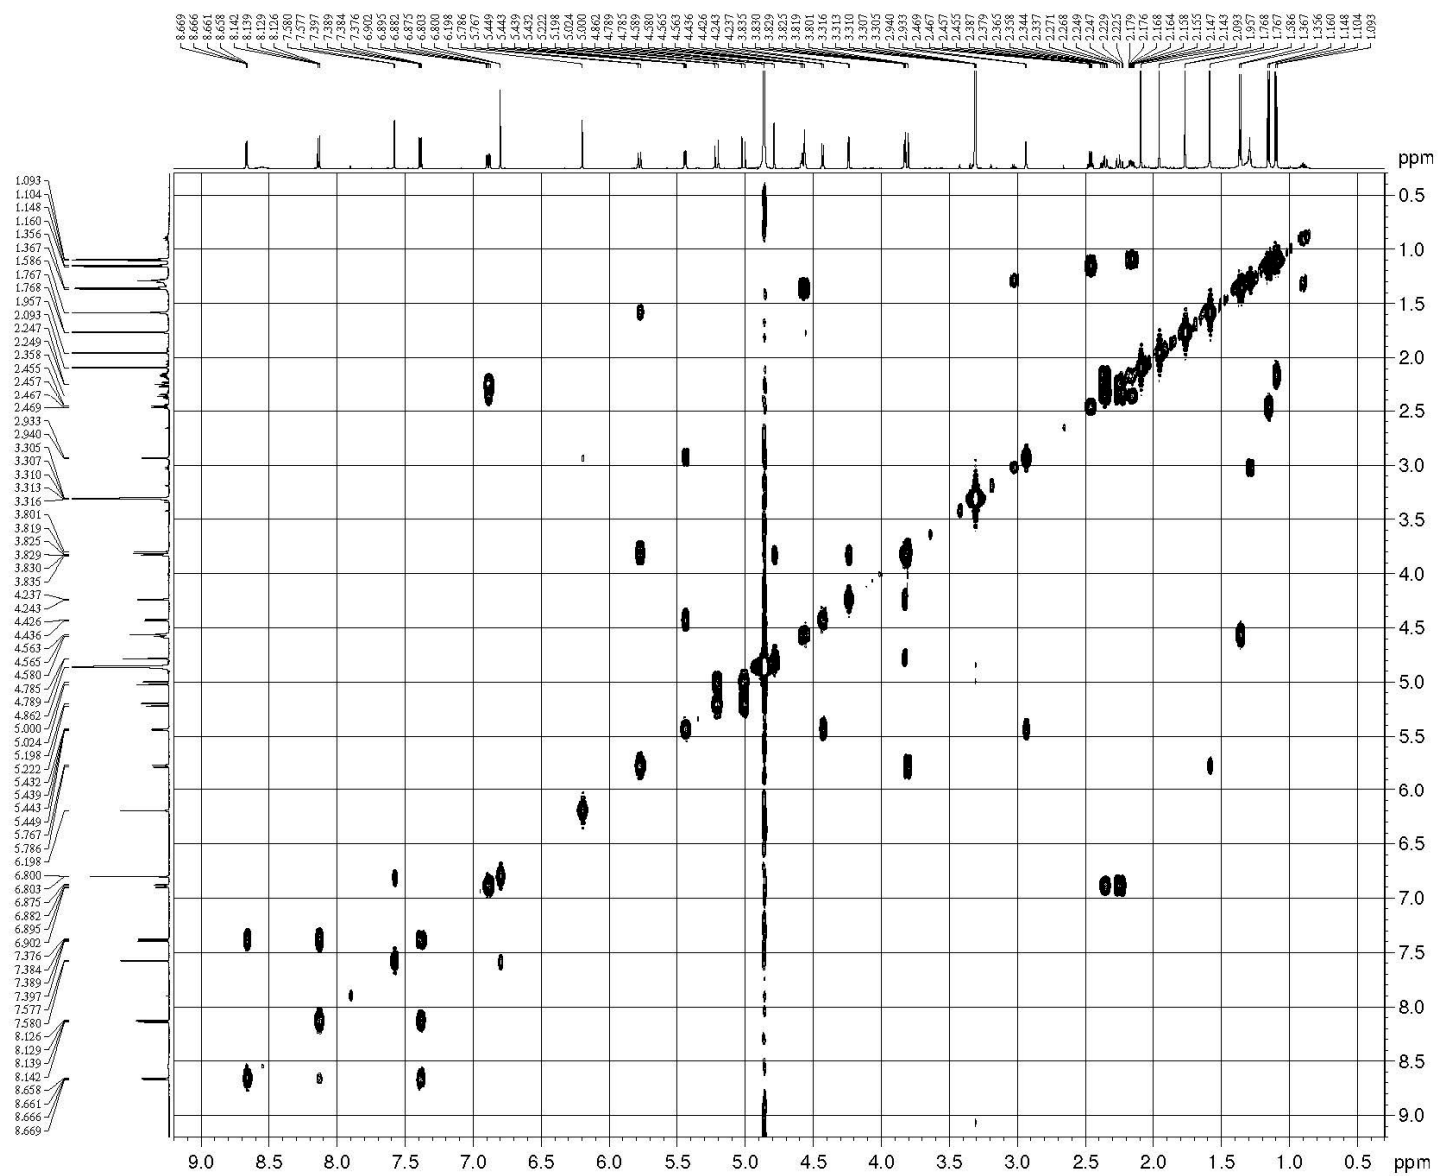

Figure S14.  $^1\text{H}$ - $^1\text{H}$  COSY spectrum of compound 2 in  $\text{CD}_3\text{OD}$ .

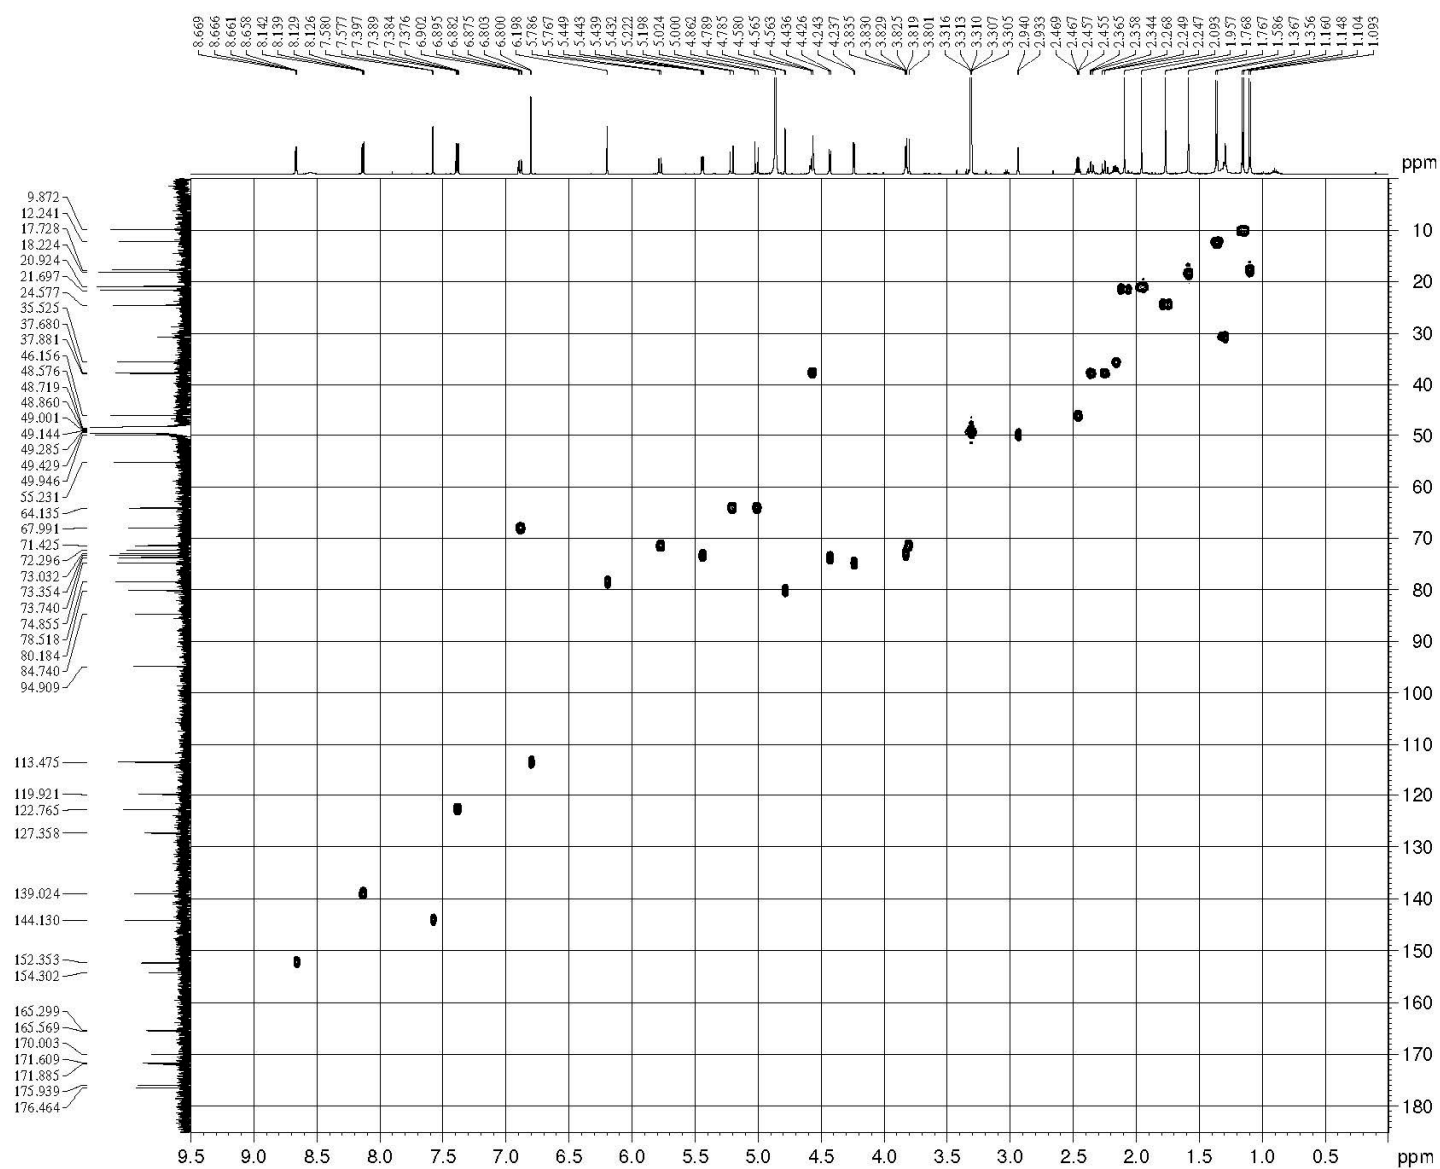Figure S15. HSQC spectrum of compound 2 in CD<sub>3</sub>OD.

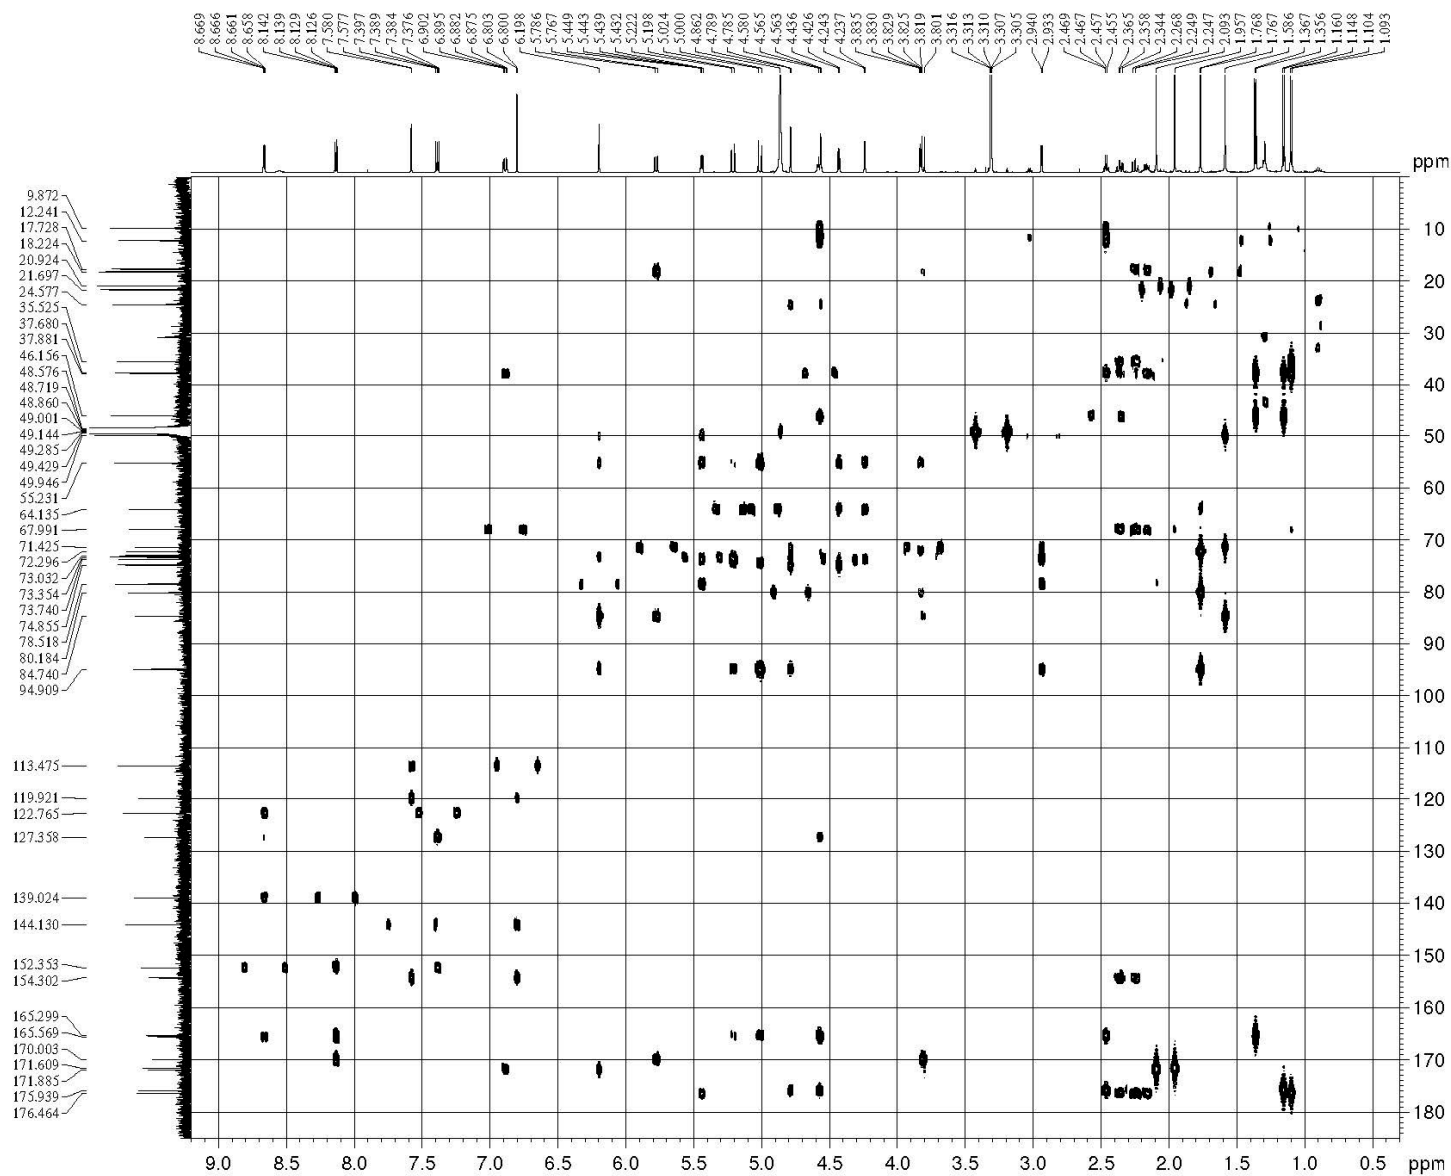Figure S16. HMBC spectrum of compound 2 in CD<sub>3</sub>OD.



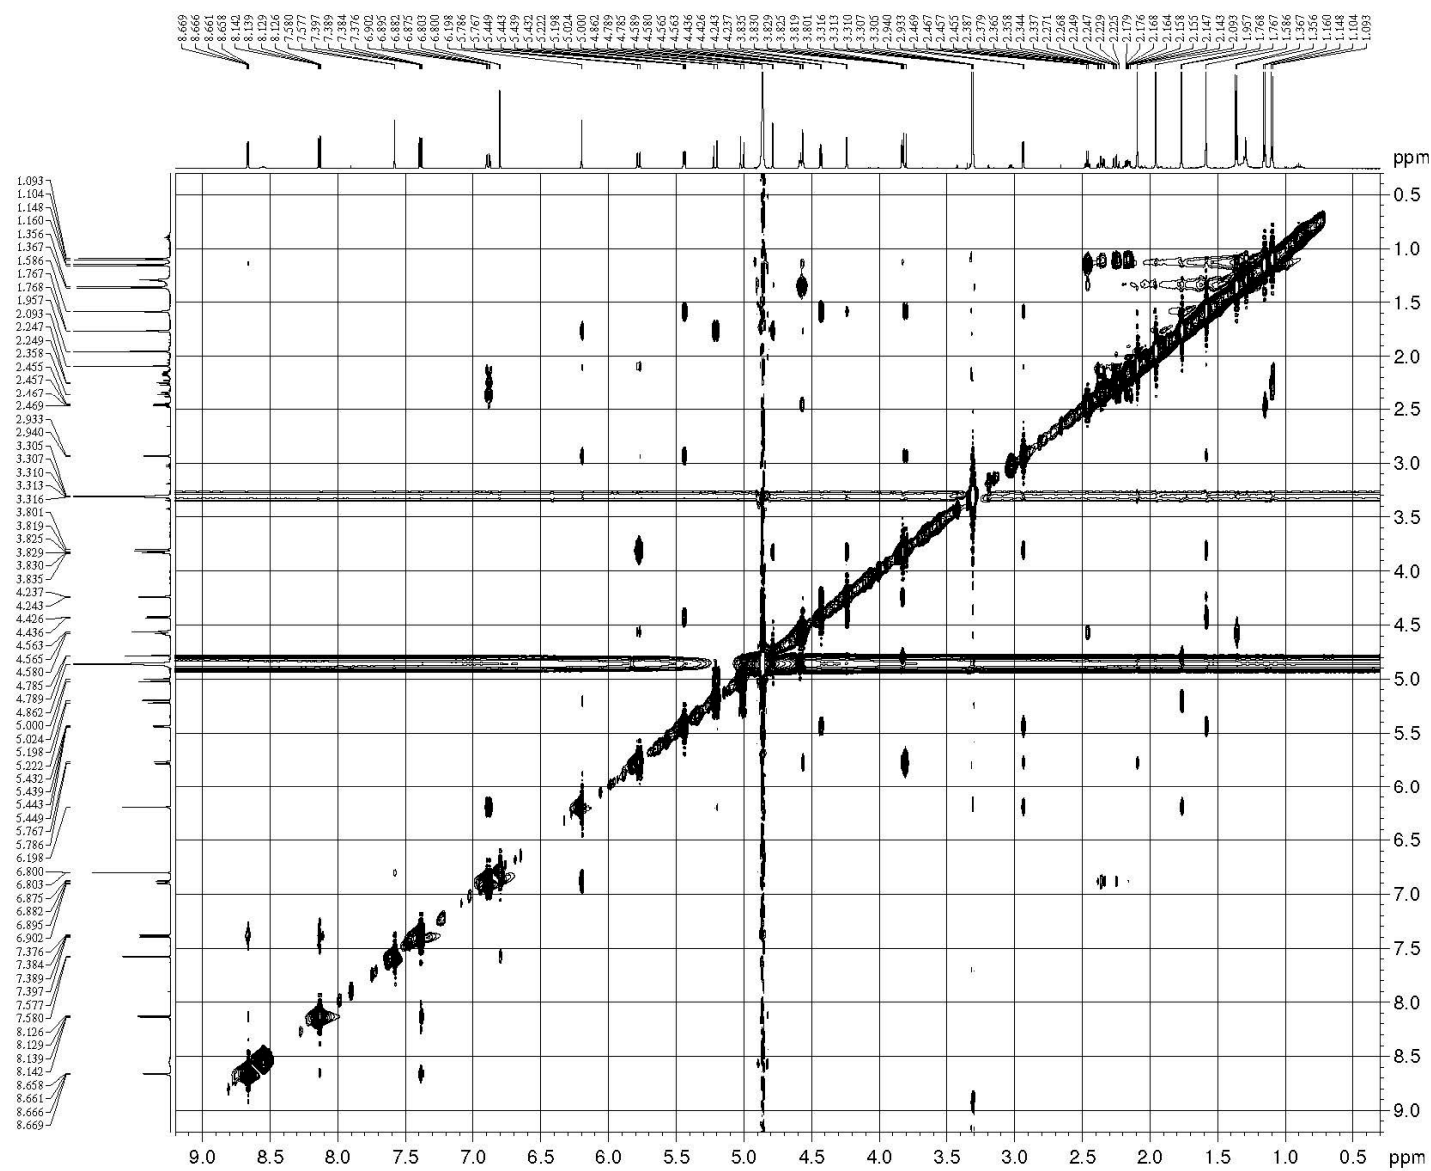Figure S17. NOESY spectrum of compound 2 in CD<sub>3</sub>OD.

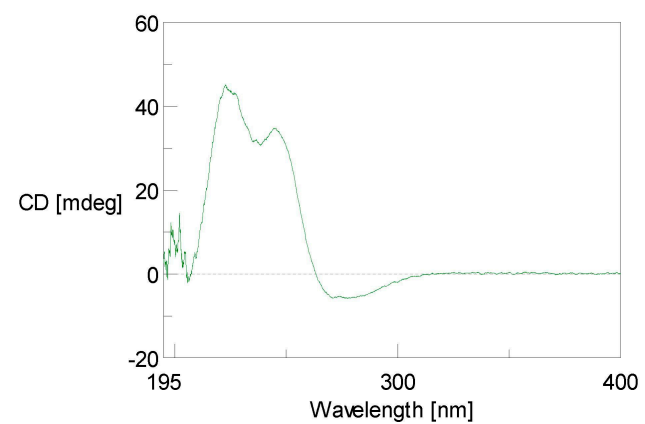

**Figure S18.** CD spectrum of compound **2** in MeOH.
